# Supplementary material for: A Review on Genus Paramacrobiotus
Source: Preprints.org preprint supplement (doi:10.20944/preprints202307.1250.v1), 2023-07-18
Supplement: Supplementary file 3 [file supplementary]

## Sheet: Sheet1
Species	Loactions	Mode of reproduction	Genetic data
Paramacrobiotus alekseevi	14°44'23.91"N, 101°34'25.38"E	NA	NA
Paramacrobiotus arduus	42°N 45.853, 012°E 13.476	bisexual	present
Paramacrobiotus areolatus	77°1’24”N, 15°34’58”E; 77°00’45”N, 15°33’35”E; 74°27’08”N, 19°06’48”E; 78°38’13’’N, 16°46’07’’E	bisexual and unisexual	present
Paramacrobiotus beotiae	38°21'59"N, 23°05'47.85"E; 40°48'06.14"N, 22°02'38.27"E; 44°57'07.86"N, 34°06'08.58"E	NA	NA
Paramacrobiotus celsus	44°N 16.775, 010°E 40.133	bisexual	present
Paramacrobiotus centesimus	0°9'S, 78°32'W; 24°41'42"S, 54°26'11"W	NA	NA
Paramacrobiotus chieregoi	11°37'24.27"N, 92°43'35.33"E	NA	NA
Paramacrobiotus corgatensis	4°38'06.42"S, 55°27'39.31"E	NA	NA
Paramacrobiotus csotiensisA10:A24 (Iharos, 1966)	47°21’ N, 17°36’ E	NA	NA
Paramacrobiotus danielae	0°41'27.02"S, 77°18'32.40"W; 12°34'50.95"S, 69°12'11.69"W	NA	NA
Paramacrobiotus danielisae	4°27'54.96"S, 55°13'10.93"E	NA	NA
Paramacrobiotus depressus	45°N 58.724, 010°E 49.374; 46°N 09.742, 010°E 59.455; 44°N 26.521, 010°E 53.207	bisexual	present
Paramacrobiotus derkai	06°26’ N, 72°15’ W	NA	NA
Paramacrobiotus experimentalis	18°56′37″S, 48°30′52″E	bisexual	present
Paramacrobiotus fairbanksi	41°19'36"N, 19°49'08"E; 67°39′S, 46°09′E; 51°24'21"N, 116°14'27"W; 44°26'N, 10°51'E; 32°44'37.3"N, 16°54'14.4"W; 47°49'57.0"N, 107°31'26.8"E; 50°03'44"N, 19°57'26"E; 40°52′42″N, 03°50′45″W; 64°50'N, 147°43'E	parthenogenetic	present
Paramacrobiotus filipi	4°02'N; 114°49'E	parthenogenetic	present
Paramacrobiotus gadabouti	32°44'36.7"N 16°54'28.0"W; 32°49'06"N, 16°59'19"W; 31°57'16''S, 115°50'40''E; 48°51'35.5''N 2°23'40''E; 36°73'92''N 8°72'99''E	parthenogenetic	present
Paramacrobiotus garynahi	52°17'08.07''N 104°17'20.20''E	NA	NA
Paramacrobiotus gerlachae	7°04'03.89''S 52°44'04.31''E	NA	NA
Paramacrobiotus halei	35°40'55.96''N 83°25'93.07''W	NA	NA
Paramacrobiotus hapukuensis	42°19'50.92''S 173°42'30.52''E	NA	NA
Paramacrobiotus huziori	9°58'58.59''N 83°50'50''W	NA	NA
Paramacrobiotus intii	13°25'S; 71°51'W	NA	NA
Paramacrobiotus kenianus	0°18'S; 36°06'E	unisexual	present
Paramacrobiotus klymenki	54°40'19"N, 29°37'27"E	NA	NA
Paramacrobiotus lachowskae	10°52′55″ N, 74°1′49″ W	NA	present
Paramacrobiotus lorenae	43°07′ N, 131°54′ E	NA	NA
Paramacrobiotus magdalenae	10°25′ N, 84°01′ W	NA	NA
Paramacrobiotus metropolitanus	35.742983°N, 139.549757°E	bisexual	present
Paramacrobiotus palaui	7°20′ N, 134°28′ E	unisexual	present
Paramacrobiotus peteri	34°50′ S, 150°34′ E	NA	NA
Paramacrobiotus pius	37°30′03″N 14°47′50″E	NA	NA
Paramacrobiotus priviterae	11°06′ N, 13°47′ W	NA	NA
Paramacrobiotus richtersi	53°N 48.447 9°W 56.629; 53°N 48.447 9°W 56.629	bisexual and unisexual	present
Paramacrobiotus rioplatensis	34°25′ S, 57°42′ W	NA	NA
Paramacrobiotus sagani	11°14'03''N 79°06'54''W; 11°13'46''N 79°06'41''W; 11°13'46''N 79°06'41''W; 11°13'56''N 74°06'53.2''W; 11°13'45.5''N 74°06'49.4''W; 11°10'24''N 74°10'37.5''W; 11°14'00.3"N 74°06'42.7"W; 11°14'00.3"N 74°06'42.7"W; 11°13'47.2"N 74°06'40.8"W	NA	NA
Paramacrobiotus savai	06°57′ N, 80°46′ E	NA	NA
Paramacrobiotus sklodowskae	34°59′ N, 32°44′ E	NA	NA
Paramacrobiotus spatialis	44°N 34.253, 010°E 50.892; 44°N 37.736, 011°E 02.234	bisexual	present
Paramacrobiotus spinosus	04°06’55’’S; 79°10’25’’W	NA	NA
Paramacrobiotus submorulatus	48°05′ N, 16°16′ E	NA	NA
Paramacrobiotus tonollii	43°47′ N, 88°47′ E	bisexual	present
Paramacrobiotus vanescens	3°04′ S, 35°29′ E	NA	NA
Paramacrobiotus walteri	43°23′ N, 43°33′ E	NA	NA
Paramacrobiotus wauensis	5°46′ S, 145°01′ E	NA	NA
